# Supplementary material for: Effect of surface-engineered AuNPs on gene expression, bacterial interaction, protein denaturation, and toxicology assay: an in vitro and in vivo model
Source: Royal Society of Chemistry journal article supplement (doi:10.1039/d4tb01731e), 2025-01-01
Supplement: d4tb01731e1.pdf [file d4tb01731e1.pdf]

## Supporting Information

### Effect of Surface-engineered AuNPs on gene expression, bacterial interaction, protein denaturation, and toxicology assay: An *in vitro* and *in vivo* model

A. Sowndarya,<sup>a</sup> T. Daniel Thangadurai,<sup>\*a</sup> Nebu George Thomas,<sup>b,c</sup> Renjith Sreedharan,<sup>d</sup> Sukumaran Anil,<sup>b,e</sup> N. Manjubaashini,<sup>f</sup> T. G. Satheesh Babu,<sup>g</sup> and S. Megha Kumar<sup>g</sup>

<sup>a</sup>Department of Chemistry and Centre for Research and Development, KPR Institute of Engineering and Technology, Coimbatore 641407, Tamilnadu, India.

<sup>b</sup>Pushpagiri Institute of Medical Sciences and Research Centre, Thiruvalla 689101, Kerala, India.

<sup>c</sup>Pushpagiri College of Dental Sciences, Thiruvalla 689101, Kerala, India.

<sup>d</sup>Jubilee Mission Medical College and Research Institute, Thrissur 680005, Kerala, India.

<sup>e</sup>Oral Health Institute, Department of Dentistry, Hamad Medical Corporation Doha, Qatar.

<sup>f</sup>National Centre for Nanoscience and Technology, University of Madras, Chennai 600025, India.

<sup>g</sup>Amrita Biosensor Research Lab, Amrita Vishwa Vidyapeetham, Coimbatore 641112, Tamilnadu, India.

\*Corresponding author: Email: [danielthangadurai.t@kpriet.ac.in](mailto:danielthangadurai.t@kpriet.ac.in); Tel.: +91 422 263 5600.

#### 1. Synthesis of PA@AuNPs

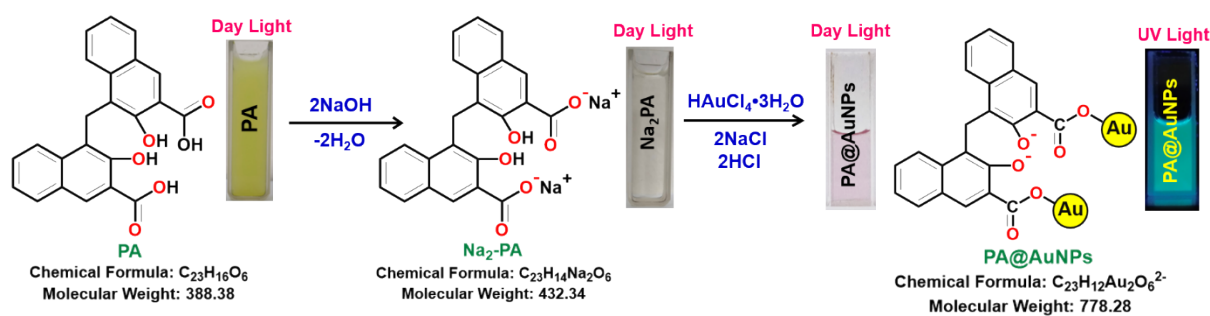

**Scheme SI1.** Synthesis of PA@AuNPs (inset images: corresponding reaction solutions under daylight and UV light).

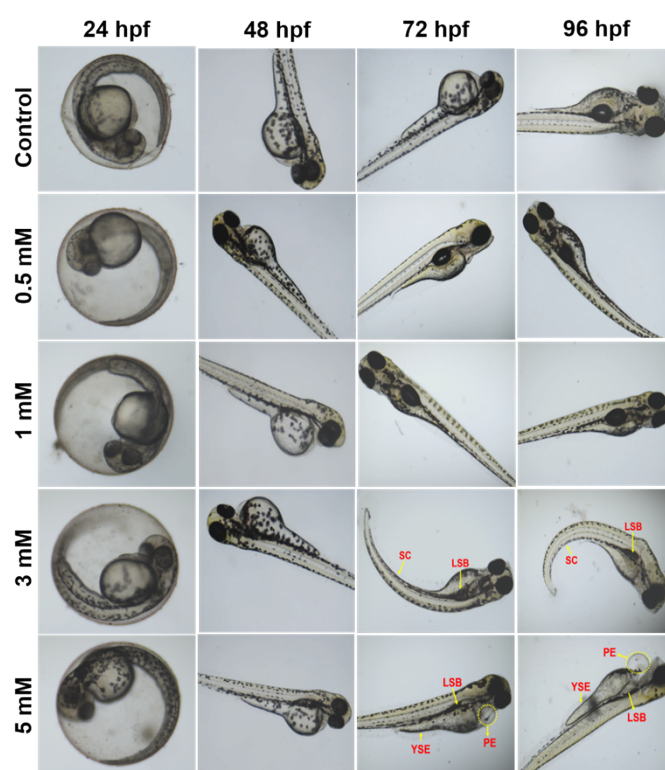

**Figure SI1.** Morphological changes in zebrafish embryos affected by various concentrations of PA@AuNPs (0.5, 1, 3, and 5 mM). The control showed normal development of an embryo, and the PA@AuNPs exposed to the embryo showed deformities like SC-spinal curvature, LSB-lack of the swim bladder, YSE-yolk solk edema, and PE-pericardial edema.

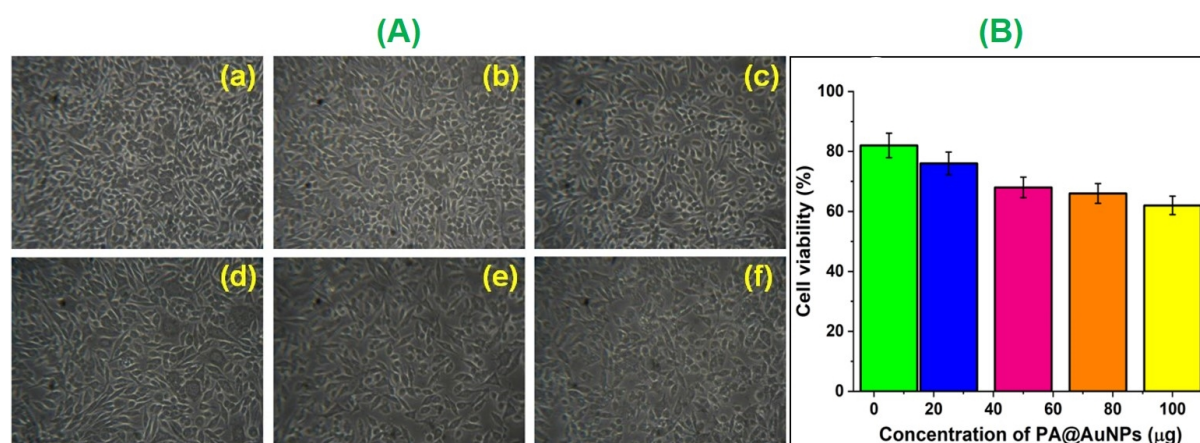

**Figure SI2.** (A) The cytotoxic effect of PA@AuNPs (0, 5, 25, 50, 75, and 100 μL) with L929 fibroblast cells by the standard MTT viability assay. L929 fibroblast cells were incubated with PA@AuNPs for 24 h (images (a) untreated L929 fibroblast cells, (b) L929 fibroblast cells + 5 μL PA@AuNPs, (c) L929 fibroblast cells + 25 μL PA@AuNPs, (d) L929 fibroblast cells + 50 μL PA@AuNPs; (e) L929 fibroblast cells + 75 μL PA@AuNPs, and L929

fibroblast cells + 100  $\mu$ L PA@AuNPs, respectively). (B) Evaluation of cell viability of PA@AuNPs (0, 5, 25, 50, 75, and 100  $\mu$ g) by the standard MTT assay.

## **2. Method**

### **2.1. Cell culture**

The cell line was cultured in a 25 cm<sup>2</sup> tissue culture flask with DMEM supplemented with 10% FBS, L-glutamine, sodium bicarbonate, and an antibiotic solution containing, Penicillin (100U/ml), Streptomycin (100 $\mu$ g/ml), and Amphotericin B (2.5 $\mu$ g/ml). Cultured cell lines were kept at 37 °C in a humidified 5% CO<sub>2</sub> incubator. The viability of cells was evaluated by direct observation of cells by an inverted phase contrast microscope and followed by the MTT assay method.

### **2.2 Cells seeding in 96 well plates**

A two-day-old confluent monolayer of cells was trypsinized and the cells were suspended in 10% growth medium, 100  $\mu$ L cell suspension ( $5 \times 10^3$  cells/well) was seeded in 96 well tissue culture plate and incubated at 37 °C in a humidified 5% CO<sub>2</sub> incubator.

### **2.3. Isolation of total RNA by TRIzol Method**

A total RNA sample was isolated following the manufacturer's instructions. By adding TRIzol solution, cells are disrupted and release RNA. As a result of adding isopropanol, RNA precipitates as a white pellet around the tube's sides and bottom. After adding 1 ml of TRIzol reagent, the culture well plate was incubated for 5 min. This mixture was transferred to a new, sterile Eppendorf tube, and 200  $\mu$ L of chloroform was added. It was then forcefully shaken for 15 sec and allowed to incubate for two to three minutes at ambient temperature. Finally, it was centrifuged for fifteen minutes at 4 °C at 14000 rpm. After gathering the obtained aqueous layer, 500  $\mu$ L of 100% isopropanol was added, and the mixture was incubated for 10 minutes at ambient temperature before being centrifuged for 15 min at 4 °C at 14000 rpm. The pellet was cleaned with 200  $\mu$ L of 75% ethanol after the supernatant was removed, and it was then centrifuged for five minutes at 4 °C at 14000 rpm in a cooling centrifuge. After drying the RNA pellet was suspended in TE buffer.

### **2.4. cDNA Synthesis**

With the TRIzol reagent, total RNA was isolated, and then total RNA's concentration and purity were assessed. With the help of a cDNA preparation kit, the template

complementary DNA was synthesized. About 5  $\mu$ L of RT easy mix, 0.5  $\mu$ L of oligodT, and an RNase-free tube were filled with 2 L of RNA template (0.5 g total RNA). Then the total reaction solution was made up to 10  $\mu$ L with the addition of sterile distilled water, and then the solution was mixed gently. For, cDNA synthesis by using a thermal cycler. The cycling conditions were applied for 20 min at 42 °C and 5 min at 85 °C (Table SI1).

**Table SI1.** Temperature and time variations in cycling conditions.

| Step              | Temperature °C | Time (minutes) | No. of cycles |
|-------------------|----------------|----------------|---------------|
| Synthesis of cDNA | 42             | 20             | 1             |
| Inactivation      | 85             | 5              | 1             |

### 3. Characterization

**Table SI2.** Statistical analysis of anticancer assay by MTT Method

| Cell line - MDA MB 231 |      |      |      |               |               |               |         |       |           |
|------------------------|------|------|------|---------------|---------------|---------------|---------|-------|-----------|
| SAMPLE CODE            |      |      |      |               |               |               |         |       |           |
|                        | OD1  | OD2  | OD3  | % viability 1 | % viability 2 | % viability 3 | Average | Stdev | Std error |
| Control                | 0.72 | 0.72 | 0.71 | 100           | 100           | 100           | 100     | 0     | 0         |
| 6.25                   | 0.61 | 0.62 | 0.62 | 84.52         | 85.50         | 87.44         | 85.82   | 1.48  | 0.49      |
| 12.5                   | 0.51 | 0.51 | 0.51 | 70.03         | 70.93         | 71.13         | 70.70   | 0.58  | 0.19      |
| 25                     | 0.41 | 0.40 | 0.40 | 57.55         | 54.94         | 56.15         | 56.21   | 1.30  | 0.43      |
| 50                     | 0.34 | 0.33 | 0.33 | 47.50         | 45.47         | 46.25         | 46.41   | 1.02  | 0.34      |
| 100                    | 0.23 | 0.22 | 0.22 | 32.80         | 31.34         | 31.92         | 32.02   | 0.73  | 0.24      |

**Table SI3.** Statistical analysis of Gene expression study

|                   | Experimental Well 1 | Experimental Well 2 | Experimental Well 3 | Control Well 1 | Control Well 2 | Control Well 3 | Average Experimental Ct Value | Average Experimental Ct Value | Average Control Ct Value | Average Control Ct Value | $\Delta$ Ct Value (Experimental) | $\Delta$ Ct Value (Control) | Delta Delta Ct Value | Expression Fold Change |
|-------------------|---------------------|---------------------|---------------------|----------------|----------------|----------------|-------------------------------|-------------------------------|--------------------------|--------------------------|----------------------------------|-----------------------------|----------------------|------------------------|
|                   | Raw Ct Value        | Raw Ct Value        | Raw Ct Value        | Raw Ct Value   | Raw Ct Value   | Raw Ct Value   | TE                            | HE                            | TC                       | HC                       | $\Delta$ CTE                     | $\Delta$ CTC                | $\Delta\Delta$ Ct    | $2^{-\Delta\Delta$ Ct  |
| Housekeeping Gene | 20.43               | 20.16               | 20.38               | 22.29          | 22.08          | 22.24          | -                             | 20.32                         | -                        | 22.20                    | 7.25                             | 6.96                        | 0.29                 | 0.816014485            |
| Gene being Tested | 27.88               | 27.59               | 27.26               | 29.35          | 29.06          | 29.08          | 27.58                         | -                             | 29.16                    | -                        |                                  |                             |                      |                        |

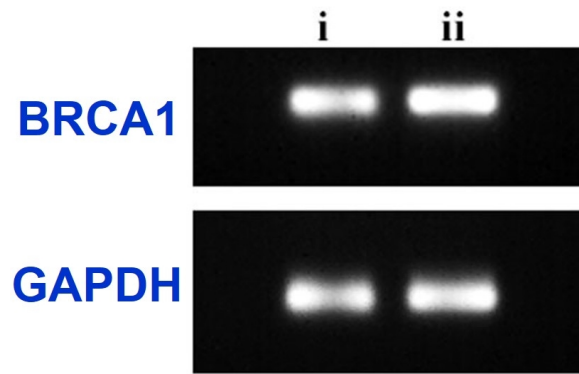

**Figure SI3.** Agarose gel electrophoresis image of GAPDH and BRCA1.

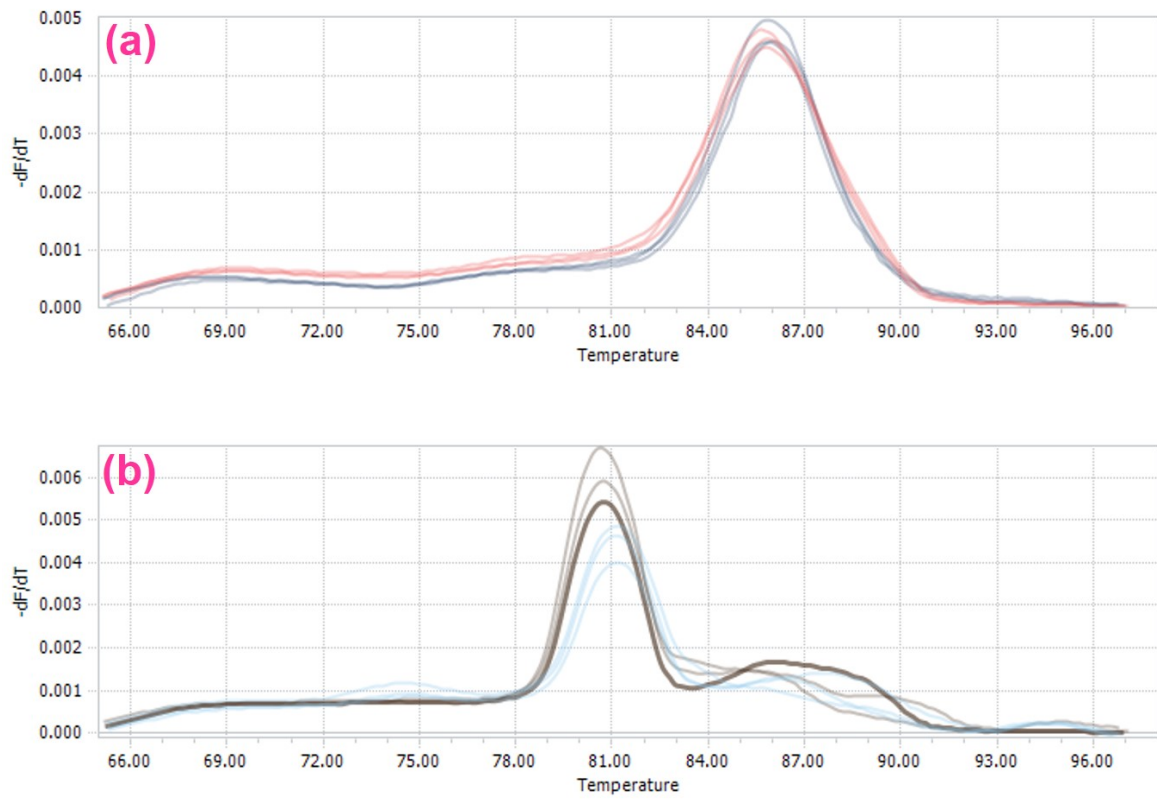

**Figure SI4.** Real-time melting peaks of PA@AuNPs, (a) GAPDH and (b) BRCA – 1.

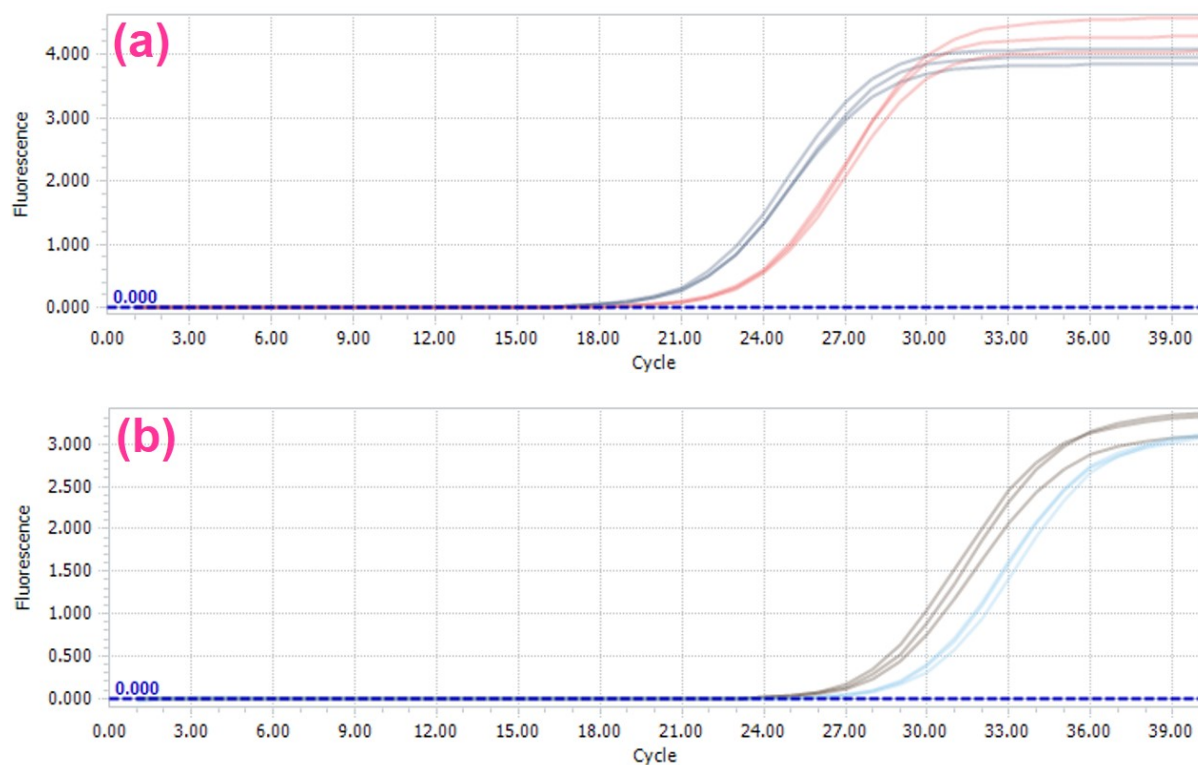

**Figure SI5.** Real-time amplification curves of PA@AuNPs, (a) GAPDH and (b) BRCA – 1.

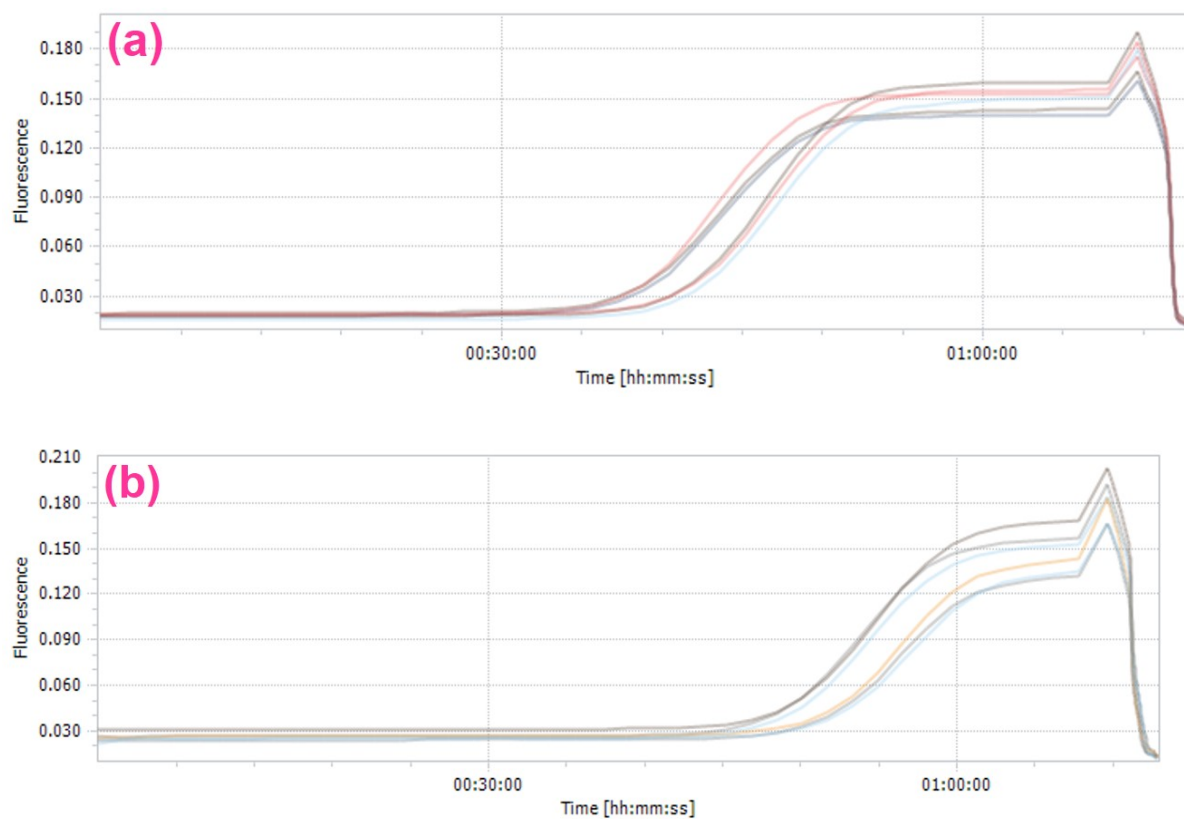

**Figure SI6.** Real-time fluorescence curves of PA@AuNPs, (a) GAPDH and (b) BRCA – 1.

**Table SI4.** The various steps involved, the time taken, and the temperature of each step.

| Steps                   | Time required | Temperature |
|-------------------------|---------------|-------------|
| Initial activation step | 2 min         | 95 °C       |
| 3 step cycling          |               |             |
| Denaturation            | 10 sec        | 95 °C       |
| Annealing               | 1 min         | 58 °C       |
| Extension               | 1 min/kb      | 72 °C       |
| Number of cycles        | 40 cycles     | 68 °C       |
| End of PCR cycling      | Indefinite    | 4 °C        |

**Table SI5.** Gross morphological changes in vital organs after acute toxicity testing of PA@AuNPs in Sprague-Dawley rats

| Parameters         | Groups      |              |             |             |              |             |
|--------------------|-------------|--------------|-------------|-------------|--------------|-------------|
|                    | Control     |              |             | PA@AuNPs    |              |             |
|                    | Heart       | Liver        | Kidney      | Heart       | Liver        | Kidney      |
| Organ Weight (gms) | 1.06 ± 0.24 | 11.07 ± 1.02 | 1.08 ± 0.12 | 1.04 ± 0.12 | 11.69 ± 1.19 | 1.08 ± 0.04 |
| Discoloration      | Nil         | Nil          | Nil         | Nil         | Nil          | Nil         |
| Lesion             | Nil         | Nil          | Nil         | Nil         | Nil          | Nil         |
| Structural change  | Nil         | Nil          | Nil         | Nil         | Nil          | Nil         |

**Table SI6.** Histological scoring of stained organ sections after acute toxicity testing

| Sl. No. | Group    | Organs |       |        |
|---------|----------|--------|-------|--------|
|         |          | Heart  | Liver | Kidney |
| 1       | Control  | 0      | 0     | 0      |
| 2       | PA@AuNPs | 0      | 0     | 0      |

**Table SI7.** Parameters under consideration during acute toxicity study.

| Sl. No. | Parameters | Control (Out of 5) | PA@AuNPs (Out of 5) |
|---------|------------|--------------------|---------------------|
|---------|------------|--------------------|---------------------|

|    |                               | animals) | animals) |
|----|-------------------------------|----------|----------|
| 1  | Mortality                     | 0        | 0        |
| 2  | Convulsions                   | 0        | 0        |
| 3  | Weight loss ( $\geq 2g$ )     | 0        | 0        |
| 4  | Salivation                    | 0        | 0        |
| 5  | Piloerection                  | 0        | 0        |
| 6  | Abnormal Reflexes             | 0        | 0        |
| 7  | Gastro-intestinal abnormality | 0        | 0        |
| 8  | Muscular tone                 | 0        | 0        |
| 9  | Motor Control                 | 0        | 0        |
| 10 | Analgesia                     | 0        | 0        |

**Table SI8.** Gross morphology surrounding PA@AuNPs after subcutaneous implantation.

| Sl. No. | Parameter                   | PA@AuNPs |           |
|---------|-----------------------------|----------|-----------|
|         |                             | Week 2   | Week 4    |
| 1       | Edema                       | Nil      | Nil       |
| 2       | Hemorrhage                  | Nil      | Nil       |
| 3       | Pus or discharge            | Nil      | Nil       |
| 4       | Lesion or ulceration        | Nil      | Nil       |
| 5       | Necrosis of adjacent tissue | Nil      | Nil       |
| 6       | Vascularization             | moderate | excellent |

**Table SI9.** Comparative table of AuNPs for *in vitro* and *in vivo* analysis.

| S. No. | Materials used                       | <i>In vitro</i> and <i>in vivo</i> models | Ref. |
|--------|--------------------------------------|-------------------------------------------|------|
| 1      | AuNPs                                | TNBC – MDA-MB-231                         | 1    |
| 2      | AuNPs                                | TNBC – MDA-MB-231                         | 2    |
| 3      | Polyethylene Modified Au-based SiRNA | TNBC – MDA-MB-231                         | 3    |

|    |                                                                          |                                                                                       |              |
|----|--------------------------------------------------------------------------|---------------------------------------------------------------------------------------|--------------|
| 4  | Thioglucose-bound AuNPs                                                  | TNBC – MDA-MB-231                                                                     | 4            |
| 5  | AuNPs                                                                    | BC – MCF-7                                                                            | 5            |
| 6  | AuNPs                                                                    | TNBC – MDA-MB-231                                                                     | 6            |
| 7  | Citrate-capped-AuNPs                                                     | TNBC – MDA-MB-231                                                                     | 7            |
| 8  | Au-Curcumin (Au-C), Au-Paclitaxel (Au-P), Au-Curcumin-Paclitaxel (Au-CP) | TNBC – MDA-MB-231                                                                     | 8            |
| 9  | AuNPs                                                                    | foodborne bacterial pathogens                                                         | 9            |
| 10 | A-AuNPs and M-AuNPs                                                      | <i>E. coli</i> , MDR <i>E. coli</i> , <i>P. a</i> , MDR <i>P. a</i> , MDR <i>K. p</i> | 10           |
| 11 | Polyelectrolyte-wrapped AuNPs                                            | <i>Shewanella oneidensis</i> and <i>Bacillus subtilis</i>                             | 11           |
| 12 | AuNPs (1000 mg /kg)                                                      | Mice and Rats                                                                         | 12           |
| 13 | Pectin-mediated-AuNPs 500 – 1000 µg                                      | Sprague Dawley Rats                                                                   | 13           |
| 14 | AuNPs 0.9, 9, 90 µg                                                      | Sprague Dawley Rats                                                                   | 14           |
| 15 | PA@AuNPs                                                                 | TNBC – MDA-MB-231, Sprague Dawley Rats, Bacterial species, and Protein denaturation   | Current work |

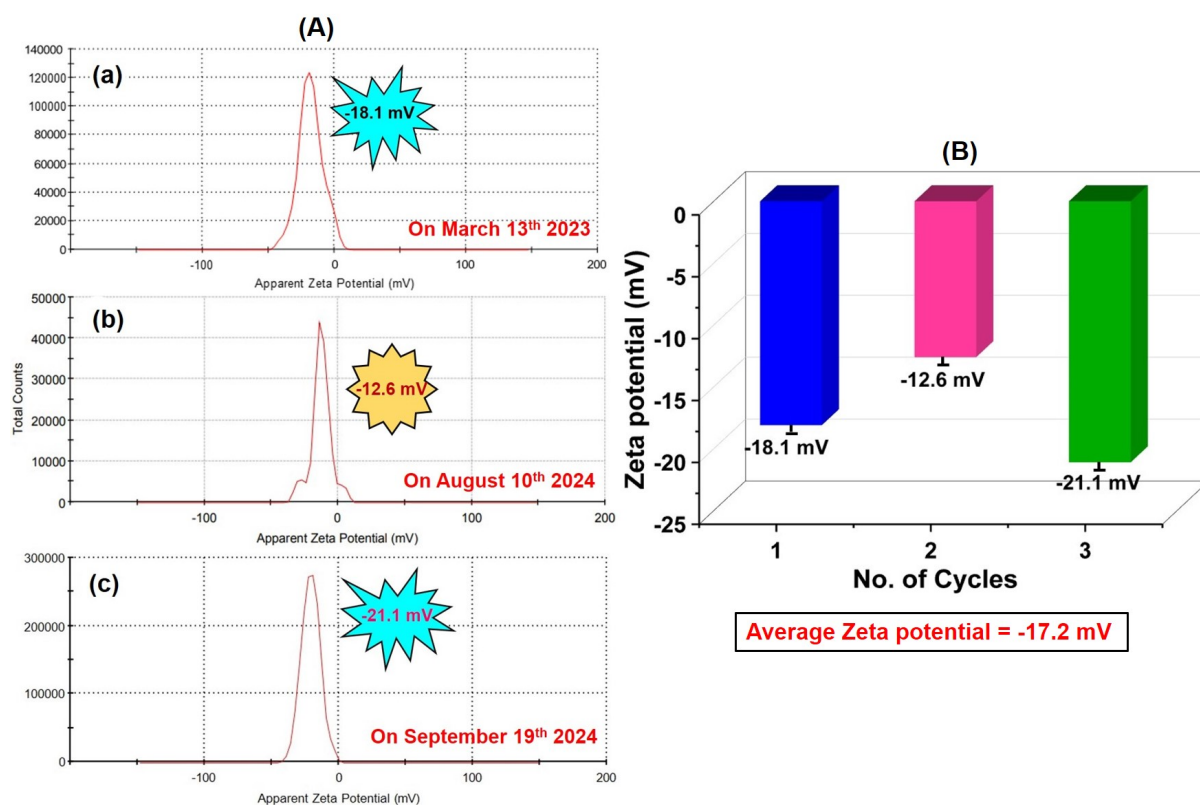

**Figure SI7.** (A) Different time interval measurements of zeta potential of PA@AuNPs (Average zeta potential = -17.2 mV), (B) Corresponding bar graph (n = 3%).

## Reference

1. Akter Z, Khan FZ, Khan MA. Gold nanoparticles in triple-negative breast cancer therapeutics. *Current Medicinal Chemistry*. 2023, 30, 316-34.
2. Surapaneni SK, Bashir S, Tikoo K. Gold nanoparticles-induced cytotoxicity in triple negative breast cancer involves different epigenetic alterations depending upon the surface charge. *Scientific reports*. 2018, 8, 12295.
3. Shahbazi R, Asik E, Kahraman N, Turk M, Ozpolat B, Ulubayram K. Modified gold-based siRNA nanotherapeutics for targeted therapy of triple-negative breast cancer. *Nanomedicine*. 2017, 16, 1961-73.
4. Wang C, Jiang Y, Li X, Hu L. Thioglucose-bound gold nanoparticles increase the radiosensitivity of a triple-negative breast cancer cell line (MDA-MB-231). *Breast cancer*. 2015, 413-20.
5. Abdel-Ghany S, Mahfouz M, Ashraf N, Sabit H, Cevik E, El-Zawahri M. Gold nanoparticles induce G2/M cell cycle arrest and enhance the expression of E-cadherin in breast cancer cells. *Inorganic and Nano-Metal Chemistry*. 2020, 50, 926-32.
6. Haynes B, Zhang Y, Liu F, Li J, Petit S, Kothayer H, Bao X, Westwell AD, Mao G, Shekhar MP. Gold nanoparticle conjugated Rad6 inhibitor induces cell death in triple negative breast cancer cells by inducing mitochondrial dysfunction and PARP-1 hyperactivation: Synthesis and characterization. *Nanomedicine: Nanotechnology, Biology and Medicine*. 2016, 12, 745-57.
7. Farhana A, Alsrhani A, Rasheed N, Rasheed Z. Gold nanoparticles attenuate the interferon- $\gamma$  induced SOCS1 expression and activation of NF- $\kappa$ B p65/50 activity via modulation of microRNA-155-5p in triple-negative breast cancer cells. *Frontiers in Immunology*. 2023, 14.
8. Chandran, K., Song, S. and Yun, S.I., 2019. Effect of size and shape controlled biogenic synthesis of gold nanoparticles and their mode of interactions against food borne bacterial pathogens. *Arabian Journal of Chemistry*, 12, 1994-2006.

9. Feng ZV, Gunsolus IL, Qiu TA, Hurley KR, Nyberg LH, Frew H, Johnson KP, Vartanian AM, Jacob LM, Lohse SE, Torelli MD. Impacts of gold nanoparticle charge and ligand type on surface binding and toxicity to Gram-negative and Gram-positive bacteria. *Chemical science*. 2015, 6, 5186-96.
10. Suganya KU, Govindaraju K, Sivaraman D, Selvaraj R, Manikandan R, Ganesh Kumar V. Nanotoxicity assessment of functionalized gold nanoparticles in Sprague–Dawley rats. *Journal of cluster science*. 2017, 2933-51.
11. Rambanapasi C, Zeevaart JR, Bunting H, Bester C, Kotze D, Hayeshi R, Grobler A. Bioaccumulation and subchronic toxicity of 14 nm gold nanoparticles in rats. *Molecules*. 2016 Jun 10;21(6):763.
12. Biological evaluation of medical devices part 10: Tests for irritation and skin sensitisation. Geneva, Switzerland: International Organization for Standardization, **2010**, ISO 10993-10:2010.
13. Biological evaluation of medical devices part 11: Tests for systemic toxicity. Geneva, Switzerland: International Organization for Standardization. **2017**, ISO 10993-11:2017.
14. Williams, D. F. On the mechanisms of biocompatibility, *Biomaterials*, **2008**, 29, 2941.
